# Supplementary material for: Ready, Willing and Able? An Investigation of the Theory of Planned Behaviour in Help-Seeking for a Community Sample with Current Untreated Depressive Symptoms
Source: PubMed Central journal article supplement (PMC7366606; doi:10.1007/s11121-020-01099-2), 2020-03-05
Supplement: 11121_2020_1099_MOESM2_ESM.pdf [file 11121_2020_1099_MOESM2_ESM.pdf]

**Online supplementary material for the following article:**

Tomczyk, S.\* , Schomerus, G., Stolzenburg, S., Muehlan, H., & Schmidt, S. (revised). Ready, Willing, and Able? An Investigation of the Theory of Planned Behaviour in Help-Seeking for a Community Sample with Current Untreated Depressive Symptoms. *Prevention Science*

---

\* Corresponding author: samuel.tomczyk@uni-greifswald.de; University of Greifswald, Institute of Psychology, Department Health and Prevention, Robert-Blum-Str. 13, 17487 Greifswald (Germany); t +49 3834 420 3806, f +49 3834 420 3812

Supplementary Table S2

*Standardized path coefficients of path models of the Theory of Planned Behaviour (TPB) regarding help-seeking from mental health professionals (psychologist, psychotherapist, or psychiatrist) for depressive symptoms in a German community sample (N = 188)*

| Variable                                     | Model 1 (attitudes, subjective norms,<br>perceived behavioural control) |           | Model 2 (attitudes, subjective norms,<br>perceived self-efficacy, perceived<br>controllability) |           |
|----------------------------------------------|-------------------------------------------------------------------------|-----------|-------------------------------------------------------------------------------------------------|-----------|
|                                              | Intention                                                               | Behaviour | Intention                                                                                       | Behaviour |
| TPB <sup>a</sup> Attitudes towards treatment | .24***                                                                  |           | .23**                                                                                           |           |
| TPB Subjective norms                         | .26***                                                                  |           | .25***                                                                                          |           |
| TPB Perceived behavioural control            | .09                                                                     | .03       |                                                                                                 |           |
| Self-efficacy                                |                                                                         |           | .15*                                                                                            | .10       |
| Controllability                              |                                                                         |           | -.03                                                                                            | -.05      |
| Age                                          | -.02                                                                    | .11       | -.02                                                                                            | .10       |
| Gender (ref. <sup>b</sup> male)              | -.02                                                                    | .05       | -.01                                                                                            | .06       |
| Monthly income                               | -.04                                                                    | -.01      | -.05                                                                                            | -.02      |
| Secondary education (ref. low)               |                                                                         |           |                                                                                                 |           |

|                          |       |       |       |       |
|--------------------------|-------|-------|-------|-------|
| Average                  | -0.01 | -0.16 | -0.01 | -0.15 |
| Highest                  | -0.04 | -0.03 | -0.03 | -0.03 |
| Past treatment (ref. no) | .07   | .10   | .07   | .09   |
| Depression severity      | .13   | .16*  | .12   | .15   |

---

*Note.* <sup>a</sup>TPB = Theory of Planned Behaviour; <sup>b</sup>ref. = reference category for binary variables;

\* $p < .05$ , \*\* $p < .01$ , \*\*\* $p < .001$
